# Supplementary material for: Fluorescent active ruthenium(ii) complex units containing bpy or phen or dmp ligands anchored on branched poly(ethylenimine): DNA binding and in vitro biological assessment
Source: Royal Society of Chemistry journal article supplement (doi:10.1039/c6ra00692b), 2016-01-01
Supplement: c6ra00692b1.pdf [file c6ra00692b1.pdf]

## Supporting Information

### Fluorescent active Ruthenium(II) Complex units containing bpy or phen or dmp ligands anchored on branched poly(ethyleneimine): DNA binding and invitro biological assessment†

Ilayaperumal Pradeep,<sup>a</sup> Balagurusamy Balajothi,<sup>a</sup> Sankaralingam Arunachalam,<sup>\*ad</sup> Rajakumar Dhivya,<sup>b</sup> Annadurai Vinothkanna,<sup>c</sup> and Mohammad Abdulkadher Akbarsha,<sup>b</sup> Soundarapandian Sekar,<sup>c</sup>

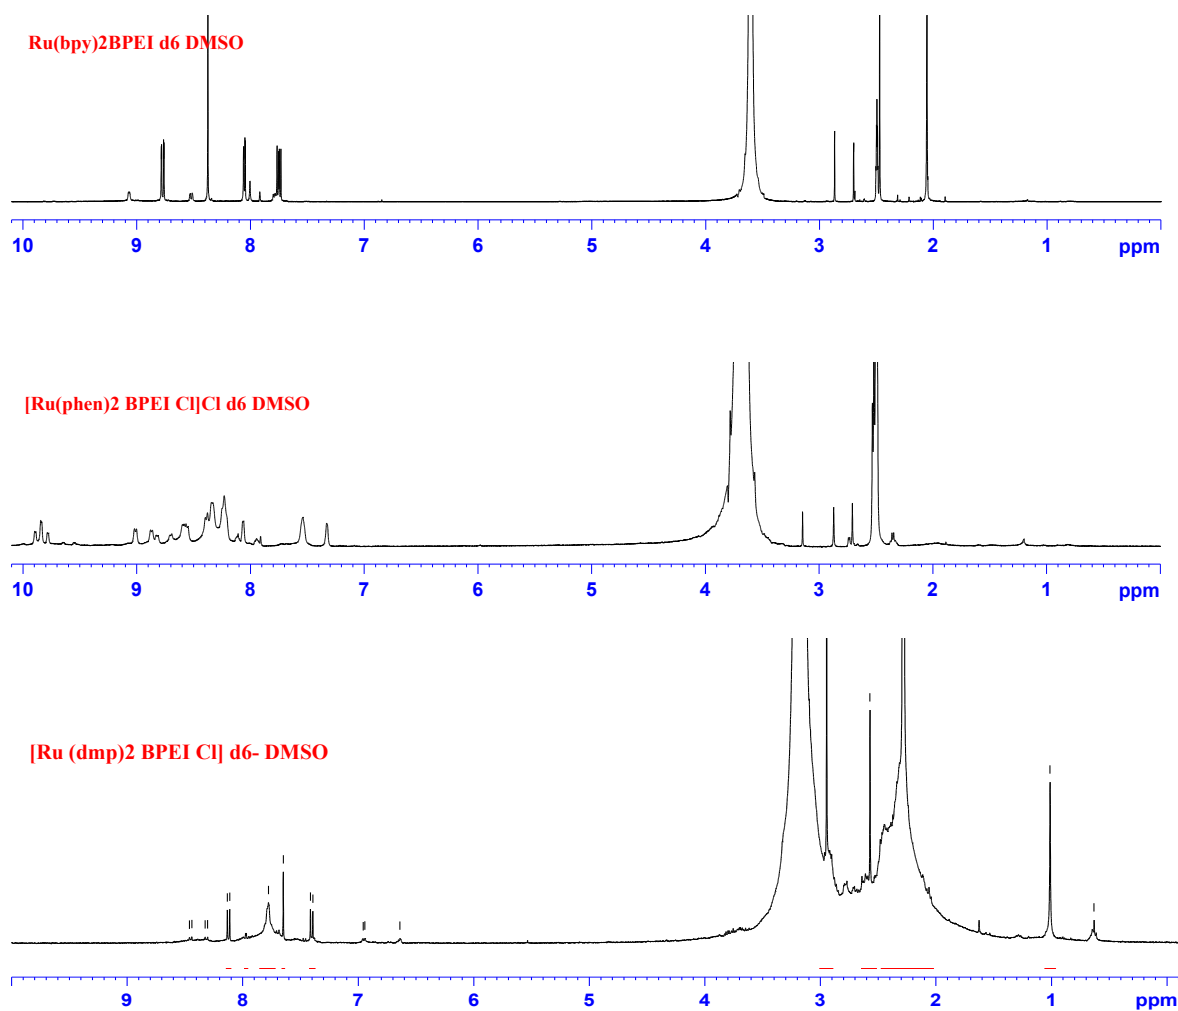

Fig. S1. <sup>1</sup>H-NMR spectra of the RuL-BPEI complexes.

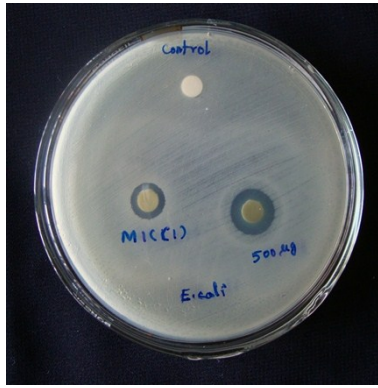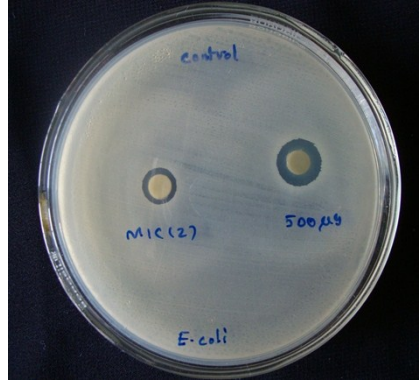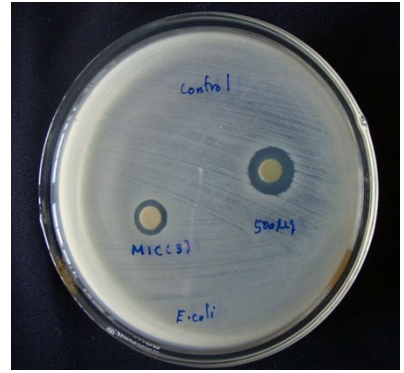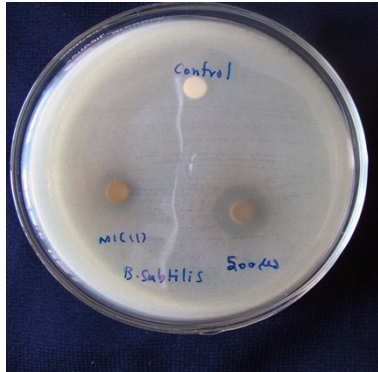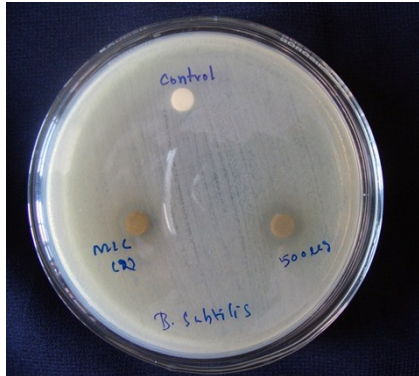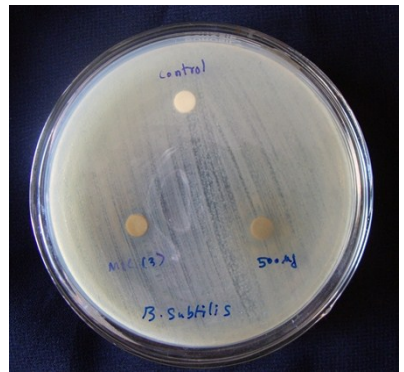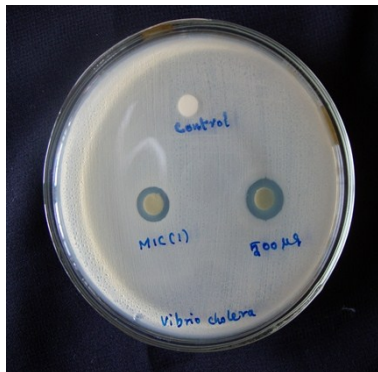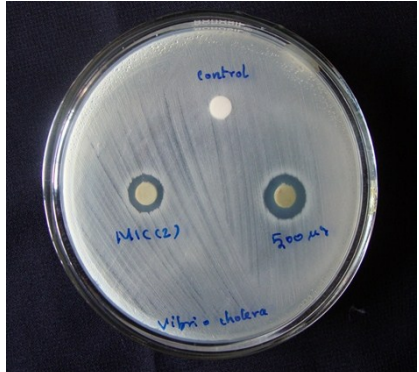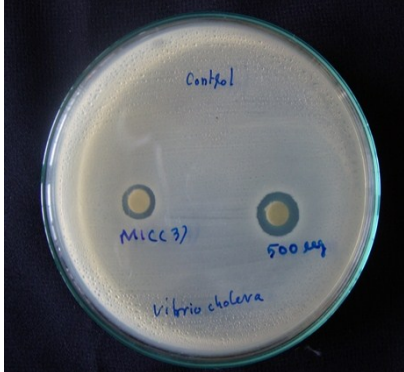

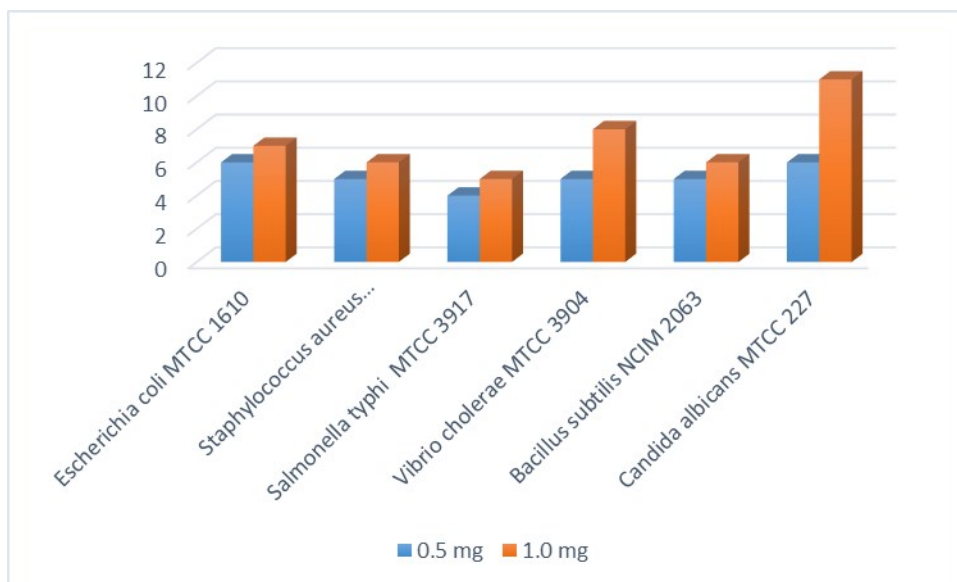

Fig. S2. Top: Antimicrobial studies plate images treated by the RuL-BPEI complexes (1,2 and 3 are represents as RuB-BPEI, RuP-BPEI and RuD-BPEI. Bottom: BPEI as a control in disk diffusion experiments carried out by the x axis 0.5 mg/ml and 1 mg/ml of the BPEI with pathogens and the y axis is zone of inhibition mm units.

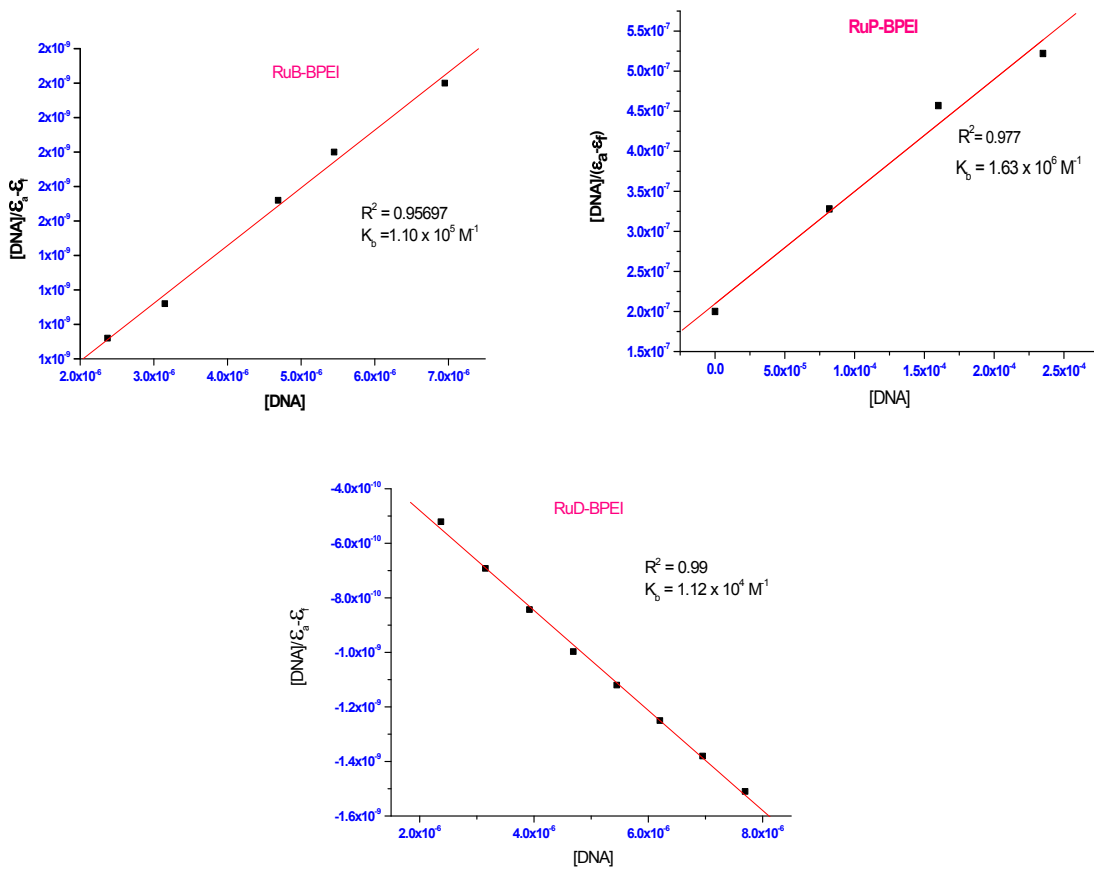

Fig. S3. Plot of [DNA] against  $[DNA]/\epsilon_a - \epsilon_f$  using UV spectroscopy for the binding constant of the RuB-BPEI and RuP-BPEI with CT-DNA.

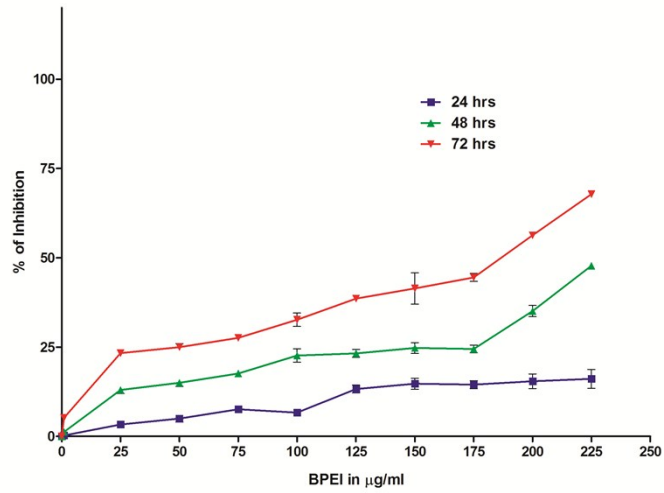

**Fig. S4. The cytotoxicity assay of BPEI on MCF-7 cells at three different time points 24, 48 and 72 h.**
